# Supplementary material for: Rapid synthesis of size-tunable transition metal carbide nanodots under ambient conditions
Source: Royal Society of Chemistry journal article supplement (doi:10.1039/c9ta03895g), 2019-01-01
Supplement: c9ta03895g1.pdf [file c9ta03895g1.pdf]

## Supporting Information

### Rapid Synthesis of Size-Tunable Transition Metal Carbide Nanodots under Ambient Condition

Jun Wan<sup>a†</sup>, Liang Huang<sup>a†</sup>, Liukang Xiong<sup>a</sup>, Jiabin Wu<sup>a</sup>, Xiang Gao<sup>a</sup>, Zhimi Hu<sup>a</sup>,  
Hongrun Jin<sup>a</sup>, He Zhou<sup>a</sup>, Guoqun Zhang<sup>a</sup> and Jun Zhou<sup>\*a</sup>

<sup>a</sup>Wuhan National Laboratory for Optoelectronics, Huazhong University of Science and Technology, Wuhan, 430074, China.

E-mail: [jun.zhou@mail.hust.edu.cn](mailto:jun.zhou@mail.hust.edu.cn)

<sup>†</sup> These authors contributed equally to this work.

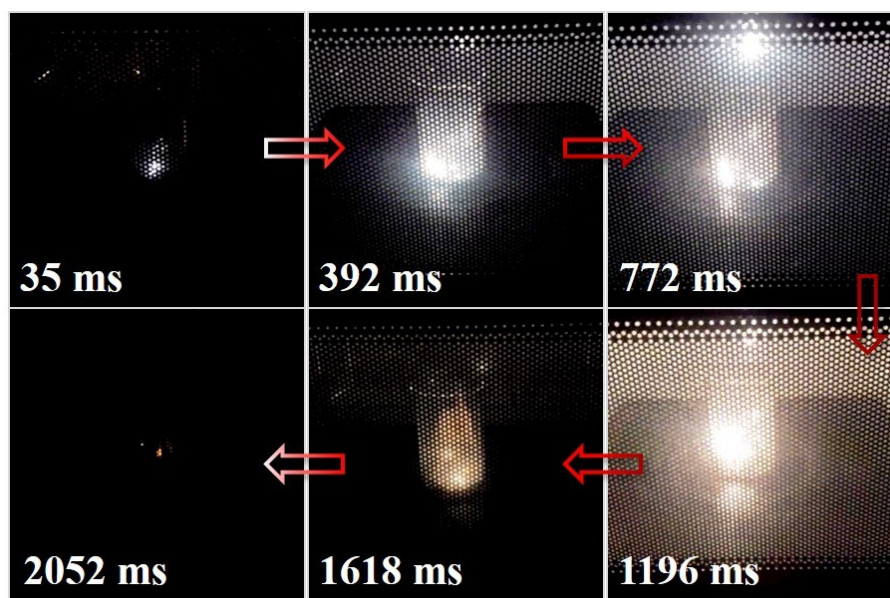

**Figure S1.** Optical images of the sample during microwave treatment with the time interval labeled as two seconds.

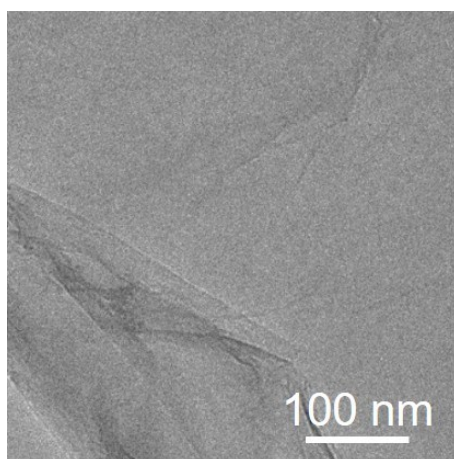

**Figure S2.** The TEM image of pure GO sample.

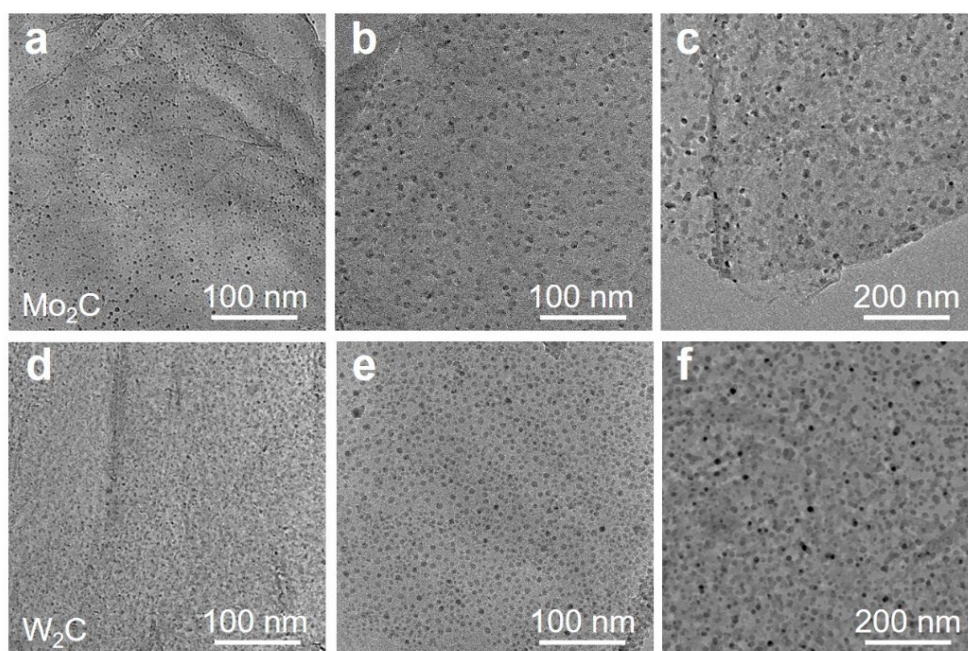

**Figure S3.** (a-c) TEM images of Mo<sub>2</sub>C nanodots achieved by different concentrations of peroxomolybdic acid: (a) 0.3 mL, (b) 0.5 mL, (c) 0.7 mL, respectively. (d-f) TEM images of W<sub>2</sub>C nanodots achieved by different concentrations of peroxotungstic acid: (d) 0.3 mL, (e) 0.5 mL, and (f) 0.7 mL, respectively.

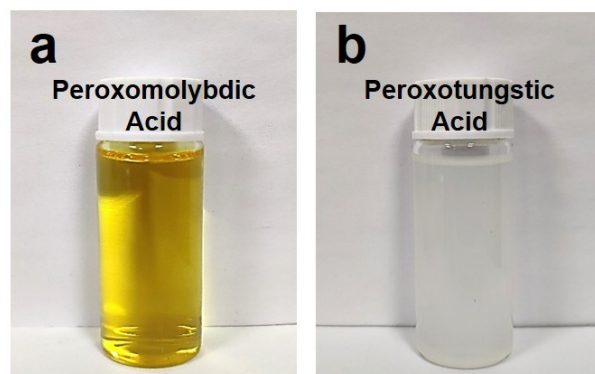

**Figure S4.** The optical images of (a) Peroxomolybdic acid and (b) Peroxotungstic acid

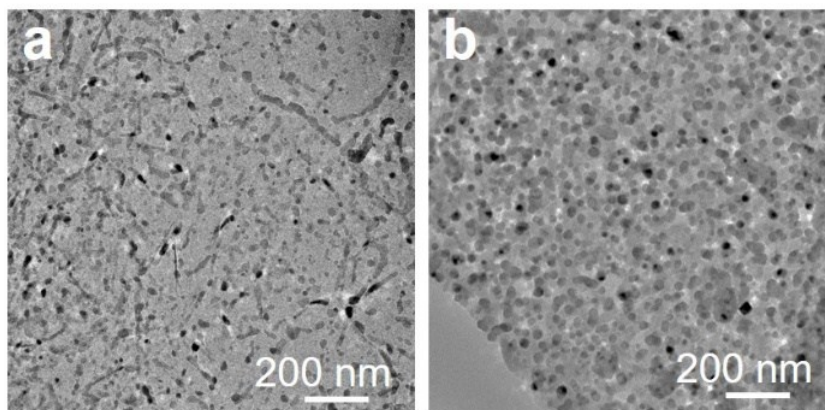

**Figure S5.** (a) TEM images of  $\text{Mo}_2\text{C}$  achieved by 1 mL peroxomolybdic acid after 120 s microwave treatment. (b) TEM images of  $\text{W}_2\text{C}$  nanodots achieved by 1 mL peroxotungstic acid after 90 s microwave treatment.

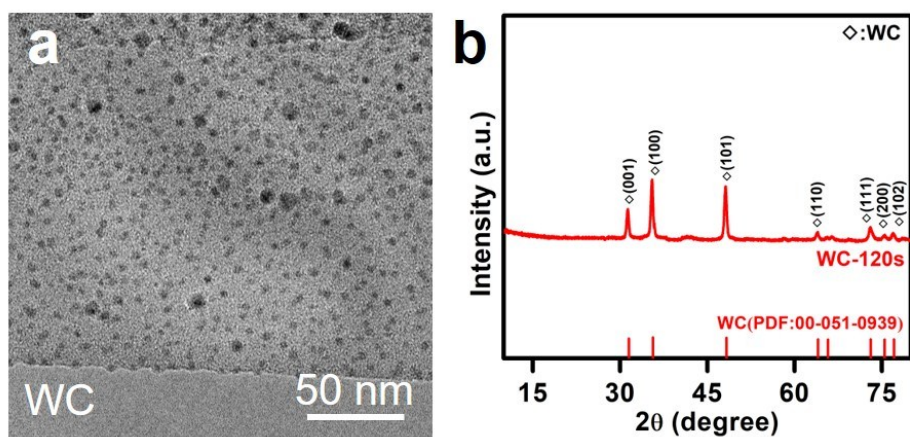

**Figure S6.** (a) TEM images of WC nanodots achieved by 0.3 mL peroxotungstic acid after 120 s microwave time. (b) XRD pattern of the as-synthesized WC nanodots.

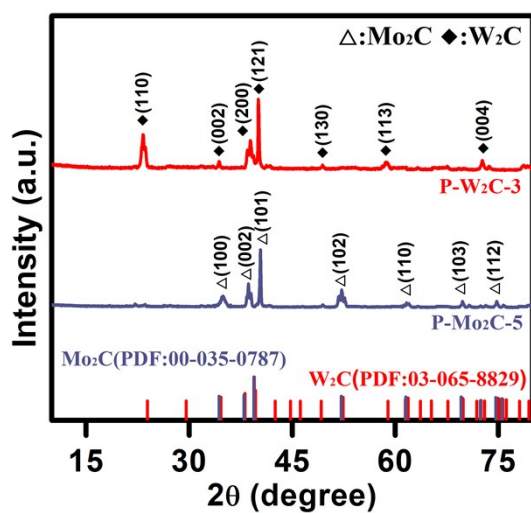

**Figure S7.** The XRD patterns of the hybrid composites fabricated by precursors of phosphomolybdic acid and phosphotungstic acid after microwave treatment for 120 s and 90 s, respectively.

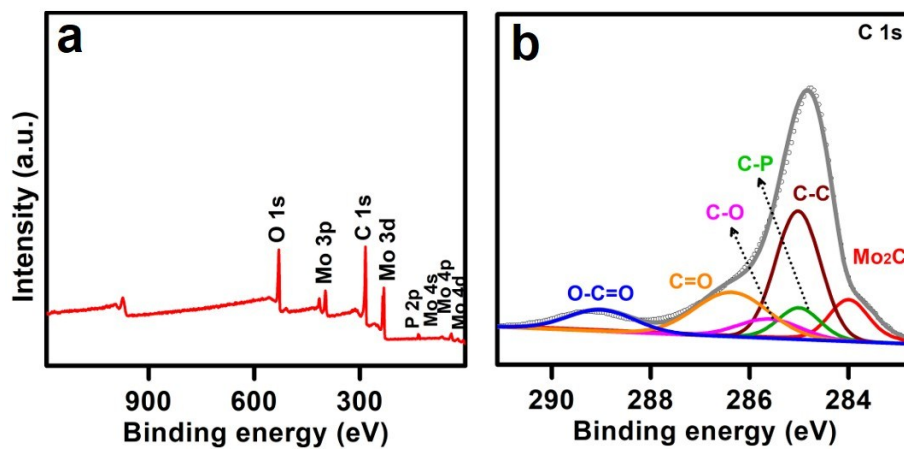

**Figure S8.** (a) The XPS survey spectra and (b) High-resolution XPS spectra of C 1s for P-Mo<sub>2</sub>C-5 sample.

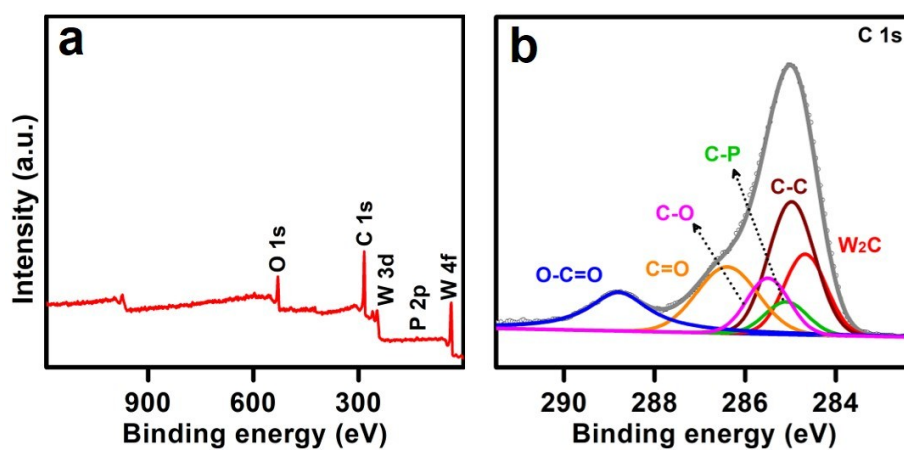

**Figure S9.** (a) The XPS survey spectra and (b) High-resolution XPS spectra of C 1s for P-W<sub>2</sub>C-3 sample.

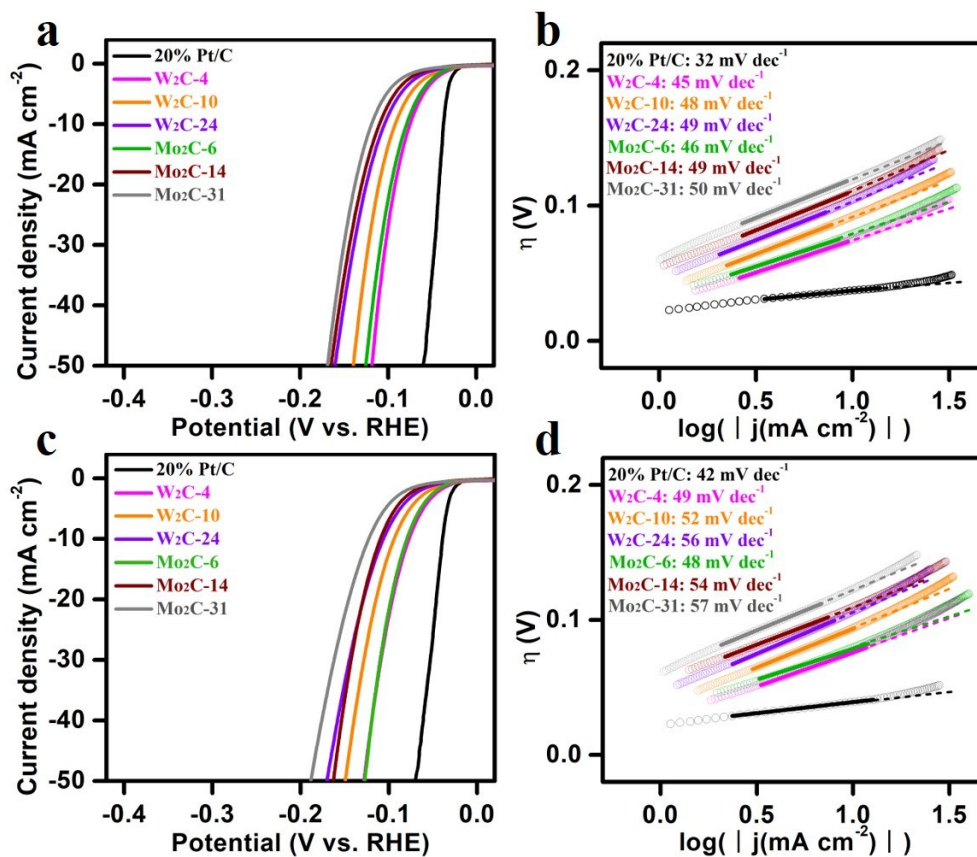

**Figure S10.** (a) Polarization curves and (b) Tafel plots of 20% Pt /C, W<sub>2</sub>C-4, W<sub>2</sub>C-10, W<sub>2</sub>C-24, Mo<sub>2</sub>C-6, Mo<sub>2</sub>C-14 and Mo<sub>2</sub>C-31 samples in 0.5 M H<sub>2</sub>SO<sub>4</sub>. (c) Polarization curves and (d) Tafel plots of 20% Pt /C, W<sub>2</sub>C-4, W<sub>2</sub>C-10, W<sub>2</sub>C-24, Mo<sub>2</sub>C-6, Mo<sub>2</sub>C-14 and Mo<sub>2</sub>C-31 samples in 0.1 M KOH.

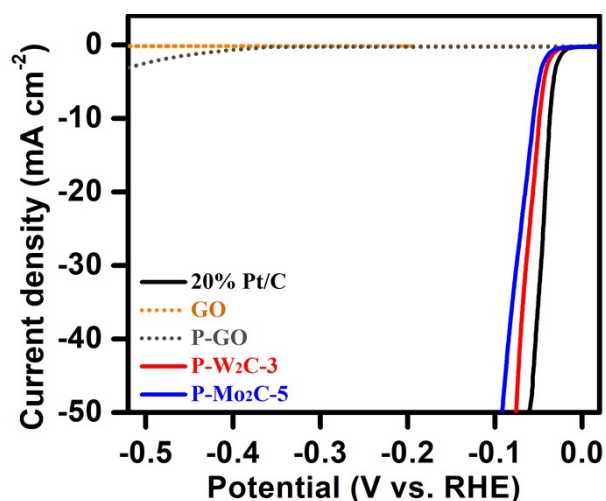

**Figure S11.** Polarization curves of 20% Pt /C, pure GO, P-doped GO, P-W<sub>2</sub>C-3 and P-Mo<sub>2</sub>C-5 samples in 0.5 M H<sub>2</sub>SO<sub>4</sub>.

| Peak  | Position BE (eV) | Atomic Conc % | Mass Conc % |
|-------|------------------|---------------|-------------|
| O 1s  | 530.700          | 7.20          | 4.85        |
| C 1s  | 284.550          | 82.25         | 21.63       |
| P 2p  | 132.200          | 1.26          | 1.64        |
| Mo 3d | 230.050          | 9.29          | 71.88       |

**Table S1.** The ratios of O, C, P, Mo elements of XPS in phosphorus doped Mo<sub>2</sub>C and graphene composites.

| Peak | Position BE (eV) | Atomic Conc % | Mass Conc % |
|------|------------------|---------------|-------------|
| O 1s | 530.550          | 8.27          | 6.09        |
| C 1s | 284.400          | 80.53         | 5.05        |
| P 2p | 133.000          | 0.84          | 1.20        |
| W 4f | 33.100           | 10.36         | 87.66       |

**Table S2.** The ratios of O, C, P, W elements of XPS in phosphorus doped W<sub>2</sub>C and graphene composites.

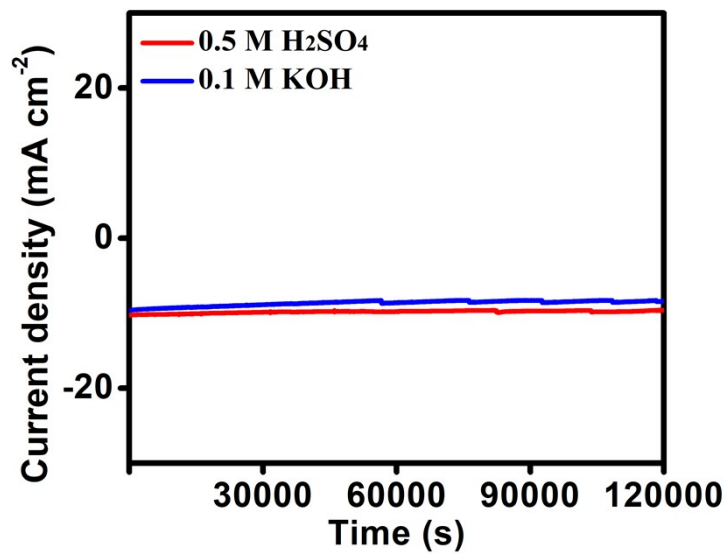

**Figure S12.** The long-term durability tests of P-W<sub>2</sub>C-3 sample at  $\eta=60$  mV.

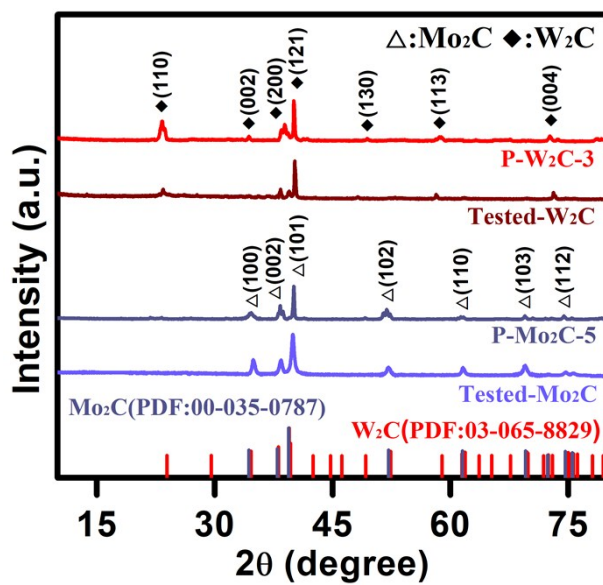

**Figure S13.** The XRD patterns of P-W<sub>2</sub>C-3 and P-Mo<sub>2</sub>C-5 before and after stability test in acid media.



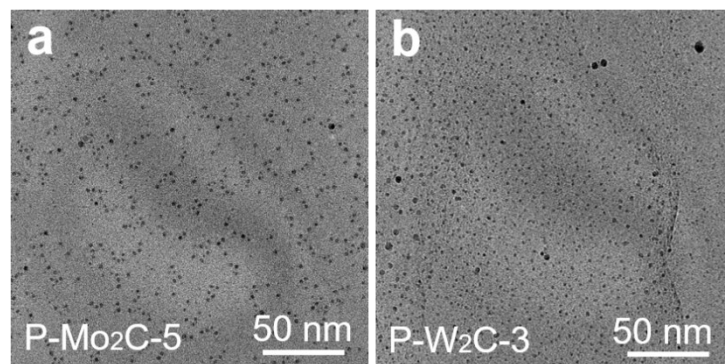

**Figure S14.** (a) TEM image of the P-Mo<sub>2</sub>C-5 sample after HER in 0.5 M H<sub>2</sub>SO<sub>4</sub>. (b) TEM image of the P-W<sub>2</sub>C-3 sample after stability test in 0.5 M H<sub>2</sub>SO<sub>4</sub>.
